# Supplementary material for: Electroporation-based delivery of cell-penetrating peptide conjugates of peptide nucleic acids for antisense inhibition of intracellular bacteria
Source: Royal Society of Chemistry journal article supplement (doi:10.1039/c4ib00172a), 2014-01-01
Supplement: c4ib00172a1.pdf [file c4ib00172a1.pdf]

## Supplementary Data

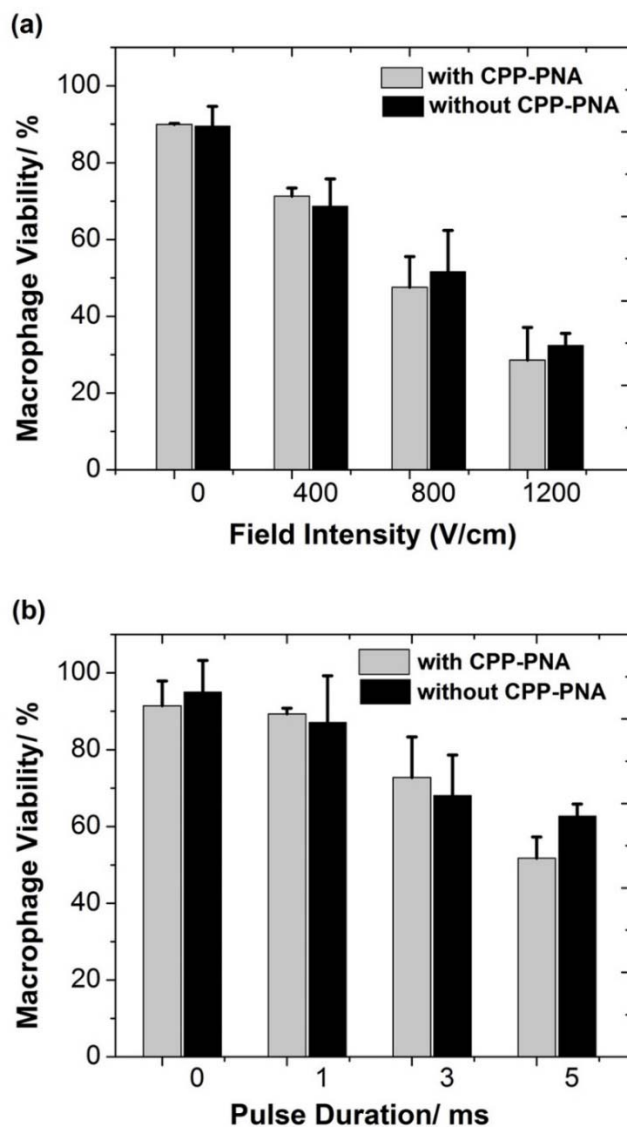

**Fig. S1** Macrophage viability under various electroporation conditions. The presence of CPP-PNA (30 $\mu$ M) did not affect the macrophage viability. Macrophages were not infected. (a) Macrophage viability under various field intensities when a single pulse with 5 ms duration was applied. (b) Macrophage viability under various pulse durations with a single pulse with 800V/cm field intensity applied.
